# Supplementary material
Source: PubMed Central journal article supplement (PMC3164946)
Supplement: NIHMS303615-supplement-1.pdf [file NIHMS303615-supplement-1.pdf]

Supplementary online material

**Brain Cannabinoid CB<sub>2</sub> Receptors Modulate Cocaine's Actions in Mice**

Zheng-Xiong Xi<sup>1, \*</sup>, Xiao-Qing Peng<sup>1, †</sup>, Xia Li<sup>1, †</sup>, Rui Song<sup>1, 2, †</sup>, Haiying Zhang<sup>1</sup>, Qing-Rong Liu<sup>1</sup>, Hong-Ju Yang<sup>1</sup>, Guo-Hua Bi<sup>1</sup>, Jie Li<sup>1</sup>, Eliot L. Gardner<sup>1</sup>

<sup>1</sup>Intramural Research Program, National Institute on Drug Abuse, Baltimore, MD 21224,

USA

<sup>2</sup>Beijing Institute of Pharmacology and Toxicology, Beijing 100850, China

**Supplementary figures:**

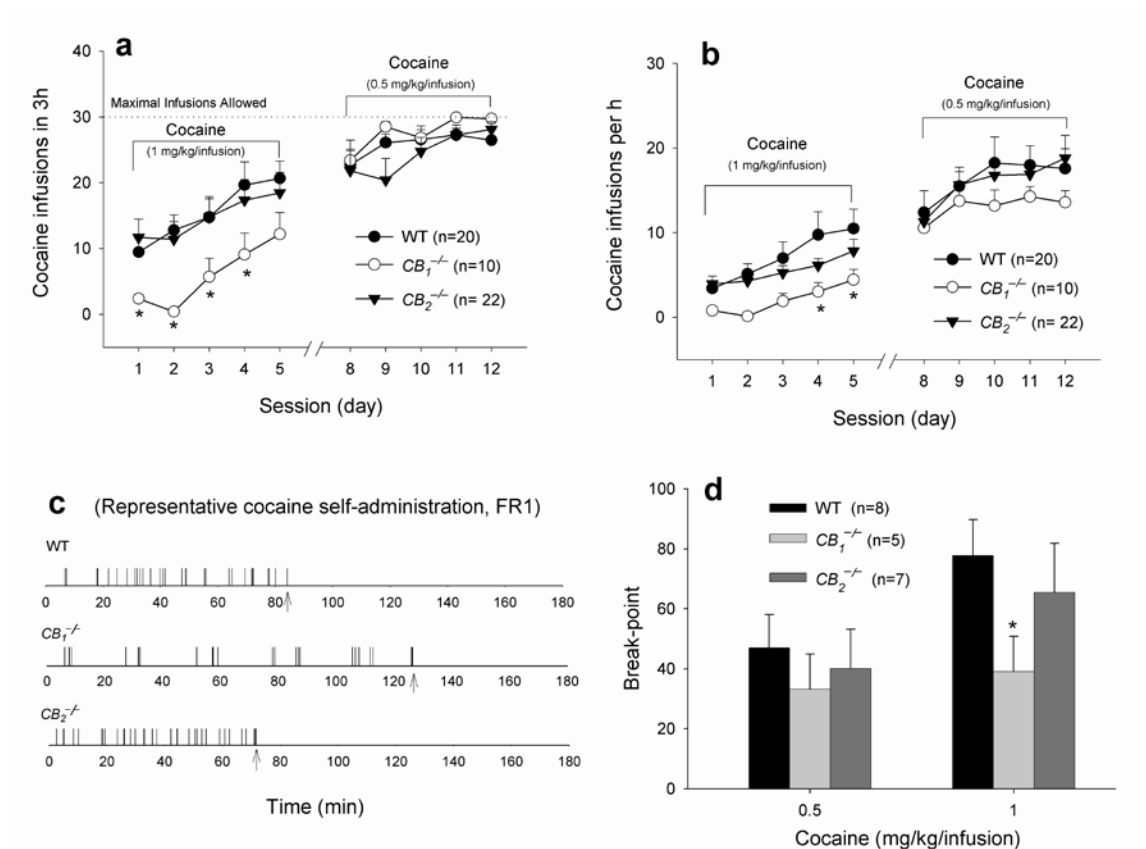

**Supplementary Fig. 1** Intravenous cocaine self-administration in WT,  $CB_1^{-/-}$  and  $CB_2^{-/-}$  mice. **(a)** Time courses of acquisition of intravenous cocaine self-administration during first 10 days of training.  $CB_1^{-/-}$ , but not  $CB_2^{-/-}$ , mice displayed a significant reduction in total number of cocaine infusions on days 1-5, compared to WT mice (two-way ANOVA for repeated measures over time,  $F_{2,49} = 3.92$ ,  $P < 0.05$ ). Only data from mice that acquired reliable cocaine self-administration (defined as  $\geq 20$  infusions during a 3h session) after the first 10 days of training are included. A maximum of 30 infusions per session were allowed to prevent cocaine overdose. **(b)** Mean rates of cocaine self-administration (infusions per h) across animals during first 10 days of cocaine self-administration training.  $CB_1^{-/-}$ , but not  $CB_2^{-/-}$ , mice displayed a significant reduction in cocaine self-administration, compared to WT mice ( $F_{2,49} = 4.27$ ,  $P < 0.05$ ). **(c)**

Representative patterns of cocaine self-administration in the three mouse strains.  $CB_1^{-/-}$  mice display a distinct “burst-like” pattern of multiple infusions in each drug-taking episode, compared to WT or  $CB_2^{-/-}$  mice. **(d)** Break-point levels for cocaine self-administration under PR reinforcement, illustrating a significant reduction in break-point in  $CB_1^{-/-}$  mice, compared to WT mice (one-way ANOVA,  $F_{1,11} = 5.48$ ,  $P < 0.05$ ). There was no significant difference in cocaine self-administration behavior between WT and  $CB_2^{-/-}$  mice. Arrow ( $\uparrow$ ) indicates the last of the maximal 30 cocaine infusions. Data are means  $\pm$  s.e.m. \*  $P < 0.05$ , compared to WT group.

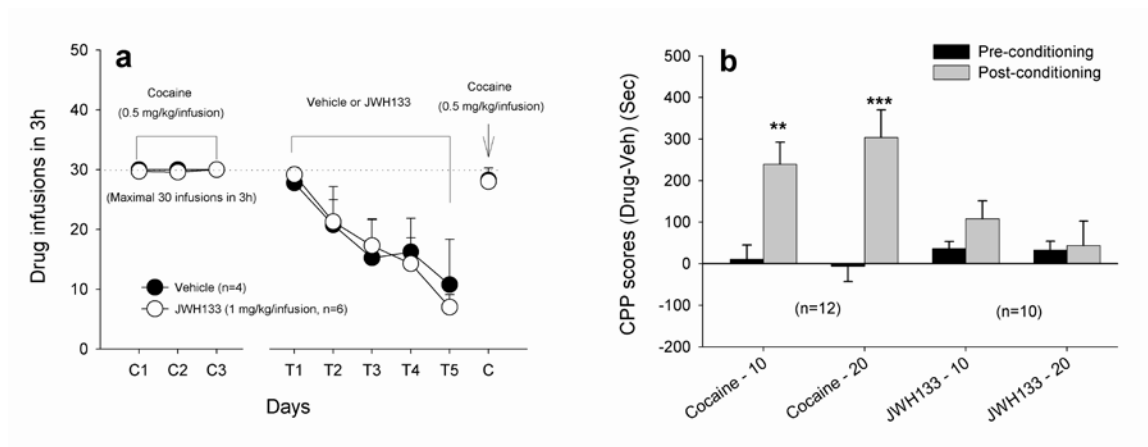

**Supplementary Fig. 2** Ability of JWH133 to sustain self-administration or produce conditioned place preference/aversion. **(a)** JWH133 failed to sustain stable self-administration in WT mice previously trained to self-administer cocaine. **(b)** Cocaine (10, 20 mg/kg) produced significant conditioned place preference, while the same doses of JWH133 produced neither conditioned place preference nor conditioned place aversion. Data are means  $\pm$  s.e.m. C1-C3, the last 3 days of cocaine self-administration. T1-T5, 5 days of JWH133 or vehicle replacement testing. \*\*  $P < 0.01$ , \*\*\*  $P < 0.001$ , compared to preconditioning.

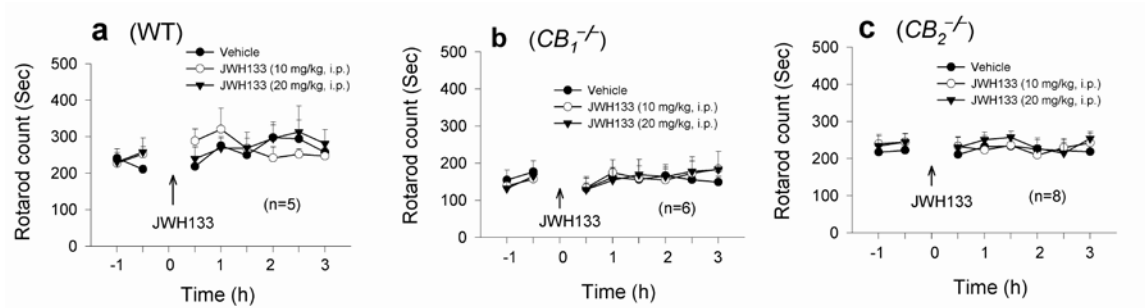

**Supplementary Fig. 3** Effects of JWH133 on locomotor performance as assessed by rotarod test. JWH133, at the doses that inhibit locomotion and cocaine self-administration, failed to alter rotarod locomotor performance in all three mouse strains.

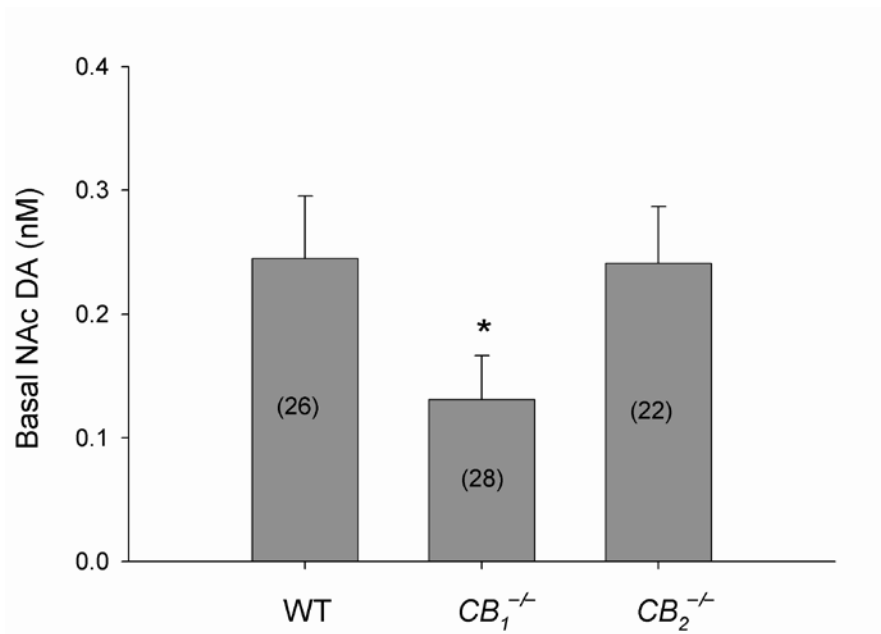

**Supplementary Fig. 4** Basal levels of extracellular DA in the NAc, illustrating a significant reduction in  $CB_1^{-/-}$  mice, compared to WT mice. \*  $P < 0.05$ , compared to WT mice. The numbers on the bar figure indicate sample sizes.

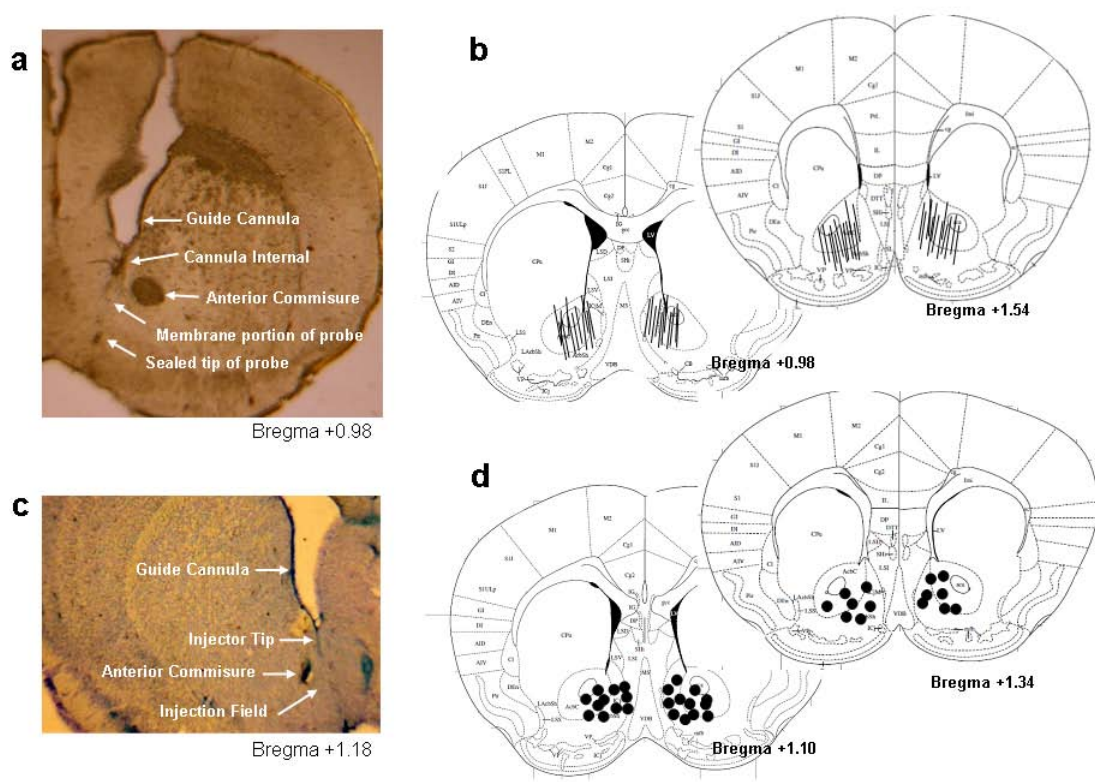

**Supplementary Fig. 5** Localizations of microdialysis probes and tips of microinjection cannulae in mouse brain. **(a)** Representative microdialysis probe track. **(b)** Schematic reconstructions of positions of microdialysis probes in mouse brain, demonstrating that active microdialysis membranes tended to span the length of the core and shell compartments of the NAc. **(c)** Representative microinjection cannula track. **(d)** Schematic reconstructions of positions of microinjection cannulae in mouse brain, demonstrating that the tips of microinjection cannulae were located in the NAc.
